# Supplementary material for: Re-pairing DNA: binding of a ruthenium phi complex to a double mismatch
Source: Royal Society of Chemistry journal article supplement (doi:10.1039/d4sc01448k), 2024-01-01
Supplement: d4sc01448k1.pdf [file d4sc01448k1.pdf]

## **Re-pairing DNA: Binding of a ruthenium phi complex to a double mismatch**

Taylor D. Prieto Otoyá<sup>a</sup>, Kane McQuaid<sup>a</sup>, Neil G. Paterson<sup>b</sup>, David Cardin<sup>a</sup>, Andrew Kellett<sup>c</sup>, Christine J. Cardin<sup>a</sup>.

<sup>a</sup>Department of Chemistry, University of Reading, Whiteknights, Reading, RG6 6AD;

<sup>b</sup>Diamond Light Source Ltd., Harwell Science and Innovation Campus, Didcot, Oxfordshire, OX11 0DE, UK

<sup>c</sup>SSPC, The Science Foundation Ireland Research centre for Pharmaceuticals, School of Chemical Sciences, Dublin City University, Glasnevin, Dublin 9, Ireland.

\* To whom correspondence should be addressed; Email: [c.j.cardin@reading.ac.uk](mailto:c.j.cardin@reading.ac.uk)

Figure S1 – Perspective view of the unit cell from the crystal structure of *rac*-[Ru(phen)<sub>2</sub>phi]<sup>2+</sup> with DNA mismatch, illustrating the solvent channels.

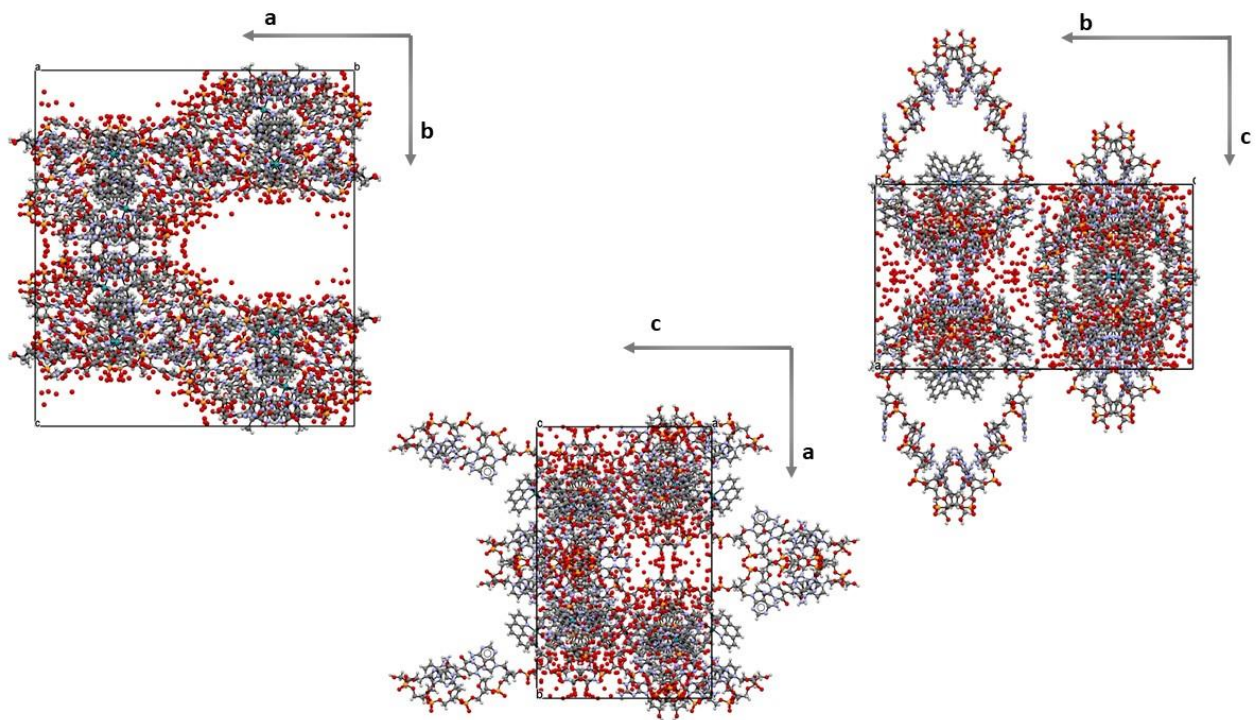

Figure S2 – Electron density around a) [Ru(phen)<sub>2</sub>phi]<sup>2+</sup>, and b) guanine-cytosine base pair, showing the high-quality data of this crystal structure. Map contouring level 0.8800 e/Å<sup>3</sup> (1.5σ).

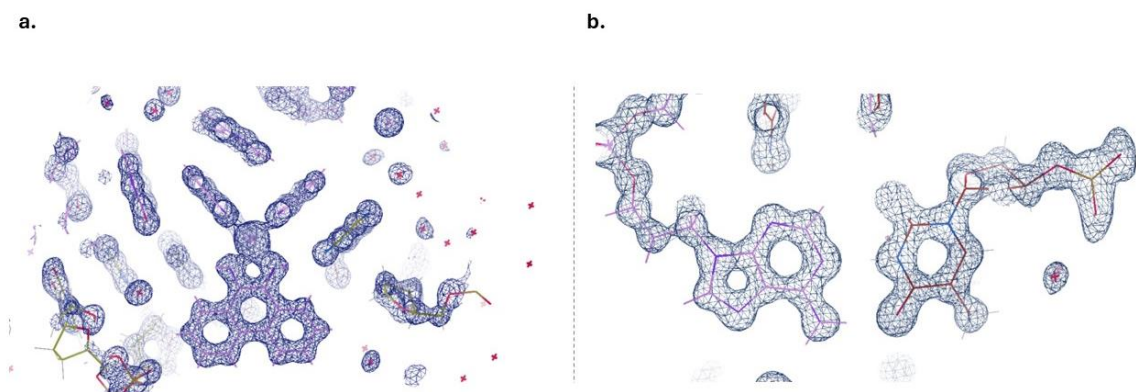

Figure S3. The location of 69 water molecules (red spheres) in this structure (8CMM), shown from both sides of the DNA backbone. The asymmetric unit, shown as spheres. Nucleic acid component – grey; ruthenium complexes – pink.  $K^+$  and  $Li^+$  shown as small spheres for clarity.

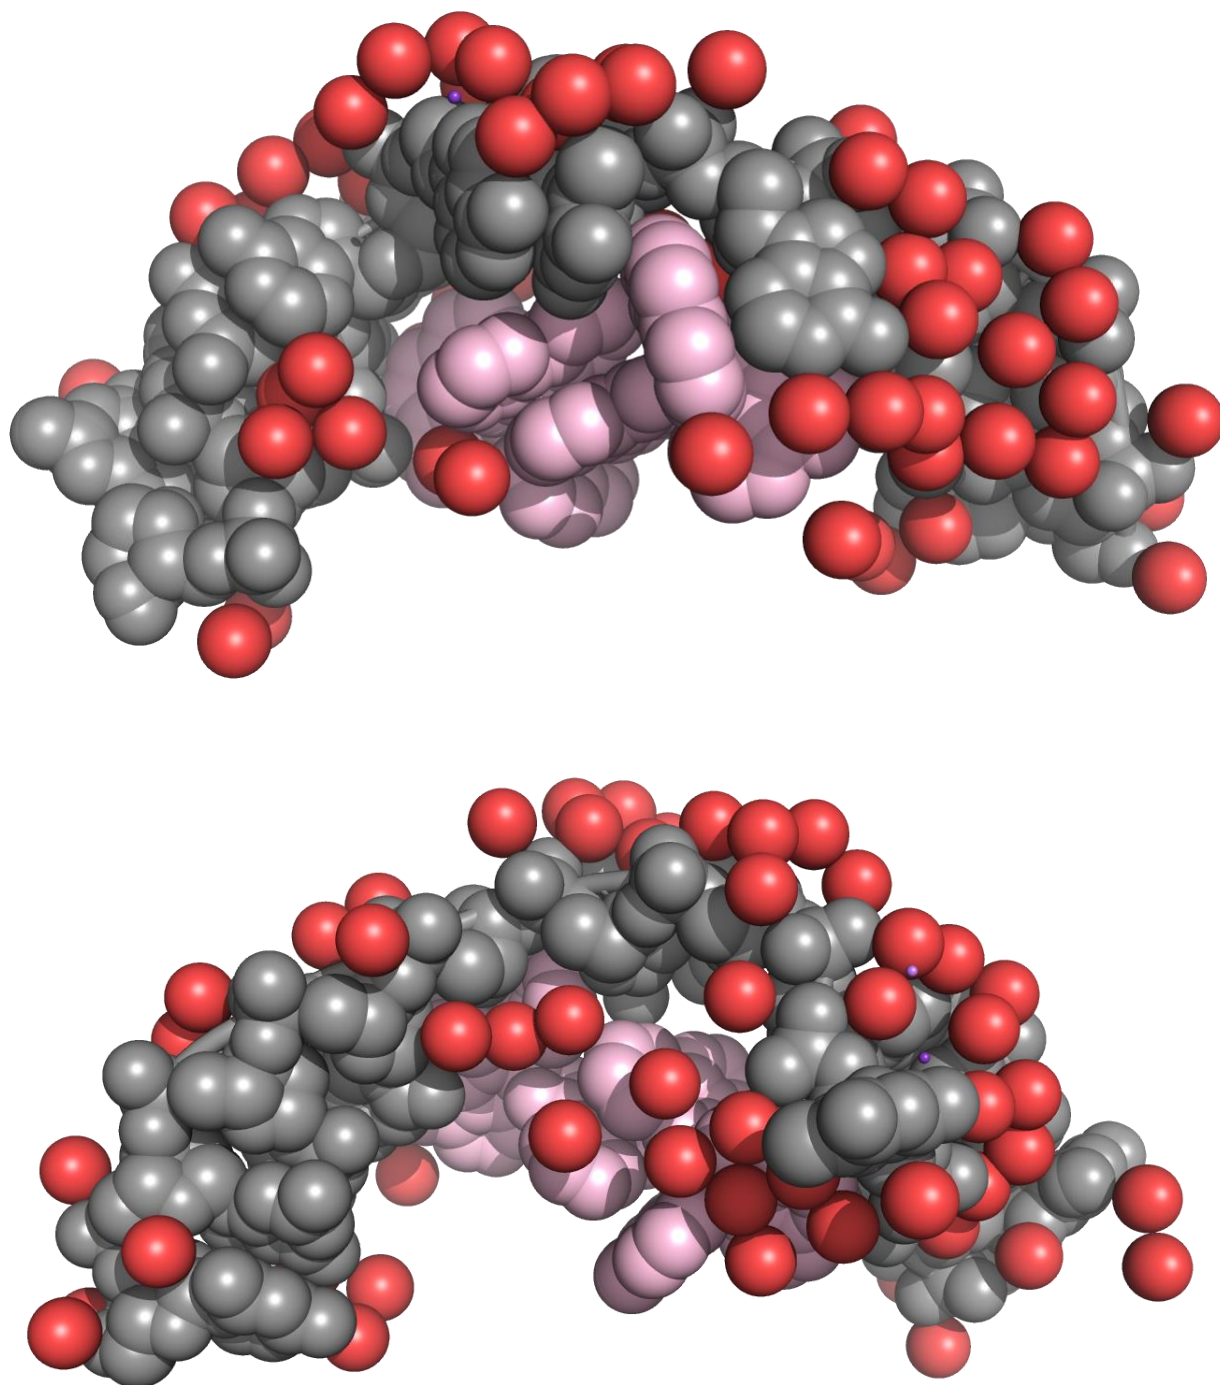

Table S1 – Summary, data collection and refinement statistics.

| <b>Data collection</b>                      |                                                       |
|---------------------------------------------|-------------------------------------------------------|
| Space group                                 | <i>I</i> 2 <sub>1</sub> 2 <sub>1</sub> 2 <sub>1</sub> |
| Resolution (Å)                              | 36.20 – 0.90                                          |
| Data collection temperature (K)             | 100                                                   |
| R <sub>merge</sub>                          | 0.044                                                 |
| R <sub>pim</sub>                            | 0.013                                                 |
| R <sub>meas</sub>                           | 0.046                                                 |
| Anisotropy                                  | 0.492                                                 |
| F <sub>o</sub> , F <sub>c</sub> correlation | 0.98                                                  |
| I/σI                                        | 1.00 (at 0.90 Å)                                      |
| CC <sub>1/2</sub>                           | 0.999                                                 |
| Completeness for range %                    | 92.47                                                 |
| Data redundancy                             | 12.1                                                  |
| Wilson B factor (Å <sup>2</sup> )           | 10.08                                                 |
| Total number of atoms                       | 447                                                   |
| Average B, all atoms (Å <sup>2</sup> )      | 13.0                                                  |
| <b>Refinement</b>                           |                                                       |
| N <sub>o</sub> reflections measured         | 27375                                                 |
| R <sub>work</sub> /R <sub>free</sub>        | 0.1359/0.1594                                         |
| Data cutoff (sigma(F))                      | NONE                                                  |
| Free R value test set count                 | 1425                                                  |
| Mean B value (overall Å <sup>2</sup> )      | 11.224                                                |
| <b>PDB ID</b>                               | <b>8CMM</b>                                           |

Table S2. Conformational analysis- The list of parameters given below correspond to the 5' to the 3' direction of strand I, and 3' to 5' direction of strand II.

| Local base-pair parameters |       |         |         |        |           |         |
|----------------------------|-------|---------|---------|--------|-----------|---------|
| bp                         | Shear | Stretch | Stagger | Buckle | Propeller | Opening |
| 1 C-G                      | 0.35  | -0.21   | 0.18    | 7.69   | -15.86    | -0.85   |
| 2 G-C                      | 0.03  | -0.15   | 0.01    | 3.21   | -18.73    | 2.98    |
| 3 C-G                      | 0.21  | -0.16   | 0.09    | 3.42   | -10.57    | -1.01   |
| 4 T-A                      | -0.16 | -0.09   | -0.32   | 13.17  | -5.09     | 4.75    |
| 5 T-A                      | 0.05  | -0.17   | 0.26    | -18.22 | 15.64     | -1.79   |
| 6 A-T                      | -0.05 | -0.17   | 0.26    | 18.22  | 15.64     | -1.79   |
| 7 A-T                      | 0.16  | -0.09   | -0.32   | -13.17 | -5.09     | 4.75    |
| 8 G-C                      | -0.21 | -0.16   | 0.09    | -3.42  | -10.57    | -1.01   |
| 9 C-G                      | -0.03 | -0.15   | 0.01    | -3.21  | -18.73    | 2.98    |
| 10 G-C                     | -0.35 | -0.21   | 0.18    | -7.69  | -15.86    | -0.85   |
| 11 G-G                     | -0.00 | -8.41   | 2.09    | 0.00   | -33.00    | -157.99 |
| 12 C-G                     | 0.35  | -0.21   | 0.18    | 7.69   | -15.86    | -0.85   |
| 13 G-C                     | 0.03  | -0.15   | 0.01    | 3.21   | -18.73    | 2.98    |
| 14 C-G                     | 0.21  | -0.16   | 0.09    | 3.42   | -10.57    | -1.01   |
| 15 T-A                     | -0.16 | -0.09   | -0.32   | 13.17  | -5.09     | 4.75    |
| 16 T-A                     | 0.05  | -0.17   | 0.26    | -18.22 | 15.64     | -1.79   |
| 17 A-T                     | -0.05 | -0.17   | 0.26    | 18.22  | 15.64     | -1.79   |
| 18 A-T                     | 0.16  | -0.09   | -0.32   | -13.17 | -5.09     | 4.75    |
| 19 G-C                     | -0.21 | -0.16   | 0.09    | -3.42  | -10.57    | -1.01   |
| 20 C-G                     | -0.03 | -0.15   | 0.01    | -3.21  | -18.73    | 2.98    |
| 21 G-C                     | -0.35 | -0.21   | 0.18    | -7.69  | -15.86    | -0.85   |
| ~~~~~                      |       |         |         |        |           |         |
| ave.                       | 0.00  | -0.55   | 0.14    | -0.00  | -8.17     | -6.75   |
| s.d.                       | 0.20  | 1.80    | 0.49    | 10.83  | 13.47     | 34.75   |

## Local base-pair step parameters

| step     | Shift | Slide | Rise | Tilt  | Roll  | Twist |
|----------|-------|-------|------|-------|-------|-------|
| 1 CG/CG  | 0.27  | 0.45  | 3.52 | 3.40  | 7.19  | 32.54 |
| 2 GC/GC  | 0.72  | -0.69 | 3.23 | -2.86 | -0.91 | 38.15 |
| 3 CT/AG  | -0.94 | -0.86 | 3.08 | 2.33  | 2.45  | 19.43 |
| 4 TT/AA  | ----  | ----  | ---- | ----  | ----  | ----  |
| 5 TA/TA  | -0.00 | 2.66  | 2.58 | -0.00 | 4.83  | 2.86  |
| 6 AA/TT  | ----  | ----  | ---- | ----  | ----  | ----  |
| 7 AG/CT  | 0.94  | -0.86 | 3.08 | -2.33 | 2.45  | 19.43 |
| 8 GC/GC  | -0.72 | -0.69 | 3.23 | 2.86  | -0.91 | 38.15 |
| 9 CG/CG  | -0.27 | 0.45  | 3.52 | -3.40 | 7.19  | 32.54 |
| 10 GG/GC | ----  | ----  | ---- | ----  | ----  | ----  |
| 11 GC/GG | ----  | ----  | ---- | ----  | ----  | ----  |
| 12 CG/CG | 0.27  | 0.45  | 3.52 | 3.40  | 7.19  | 32.54 |
| 13 GC/GC | 0.72  | -0.69 | 3.23 | -2.86 | -0.91 | 38.15 |
| 14 CT/AG | -0.94 | -0.86 | 3.08 | 2.33  | 2.45  | 19.43 |
| 15 TT/AA | ----  | ----  | ---- | ----  | ----  | ----  |
| 16 TA/TA | 0.00  | 2.66  | 2.58 | -0.00 | 4.83  | 2.86  |
| 17 AA/TT | ----  | ----  | ---- | ----  | ----  | ----  |
| 18 AG/CT | 0.94  | -0.86 | 3.08 | -2.33 | 2.45  | 19.43 |
| 19 GC/GC | -0.72 | -0.69 | 3.23 | 2.86  | -0.91 | 38.15 |
| 20 CG/CG | -0.27 | 0.45  | 3.52 | -3.40 | 7.19  | 32.54 |
| ~~~~~    |       |       |      |       |       |       |
| ave.     | 0.00  | 0.07  | 3.18 | -0.00 | 3.18  | 26.16 |
| s.d.     | 0.68  | 1.23  | 0.31 | 2.78  | 3.27  | 12.42 |

## Local base-pair helical parameters

| step     | X-disp | Y-disp | h-Rise | Incl. | Tip   | h-Twist |
|----------|--------|--------|--------|-------|-------|---------|
| 1 CG/CG  | -0.51  | 0.14   | 3.55   | 12.60 | -5.95 | 33.47   |
| 2 GC/GC  | -0.94  | -1.45  | 3.19   | -1.39 | 4.36  | 38.26   |
| 3 CT/AG  | -3.58  | 3.77   | 2.81   | 7.18  | -6.85 | 19.72   |
| 4 TT/AA  | ----   | ----   | ----   | ----  | ----  | ----    |
| 5 TA/TA  | -8.79  | -0.00  | 3.60   | 59.34 | 0.00  | 5.61    |
| 6 AA/TT  | ----   | ----   | ----   | ----  | ----  | ----    |
| 7 AG/CT  | -3.58  | -3.77  | 2.81   | 7.18  | 6.85  | 19.72   |
| 8 GC/GC  | -0.94  | 1.45   | 3.19   | -1.39 | -4.36 | 38.26   |
| 9 CG/CG  | -0.51  | -0.14  | 3.55   | 12.60 | 5.95  | 33.47   |
| 10 GG/GC | ----   | ----   | ----   | ----  | ----  | ----    |
| 11 GC/GG | ----   | ----   | ----   | ----  | ----  | ----    |
| 12 CG/CG | -0.51  | 0.14   | 3.55   | 12.60 | -5.95 | 33.47   |
| 13 GC/GC | -0.94  | -1.45  | 3.19   | -1.39 | 4.36  | 38.26   |
| 14 CT/AG | -3.58  | 3.77   | 2.81   | 7.18  | -6.85 | 19.72   |
| 15 TT/AA | ----   | ----   | ----   | ----  | ----  | ----    |
| 16 TA/TA | -8.79  | -0.00  | 3.60   | 59.34 | 0.00  | 5.61    |
| 17 AA/TT | ----   | ----   | ----   | ----  | ----  | ----    |
| 18 AG/CT | -3.58  | -3.77  | 2.81   | 7.18  | 6.85  | 19.72   |
| 19 GC/GC | -0.94  | 1.45   | 3.19   | -1.39 | -4.36 | 38.26   |
| 20 CG/CG | -0.51  | -0.14  | 3.55   | 12.60 | 5.95  | 33.47   |
| ~~~~~    |        |        |        |       |       |         |
| ave.     | -2.69  | -0.00  | 3.24   | 13.73 | 0.00  | 26.93   |
| s.d.     | 2.89   | 2.24   | 0.33   | 20.10 | 5.58  | 11.77   |
